# Supplementary material
Source: publisher figshare collection journal article supplement (https://tandf.figshare.com/ndownloader/files/18033920)
Supplement: Supplementary file 1 [file 18033920]

| Primer name | DNA sequence (5’-3’) |
| --- | --- |
| ITS1  ITS4  caHWP1-F  caHWP1-R  caALS3-F  caALS3-R  caECE1-F  caECE1-R  caHOG1-F  caHOG1-R  caCEK1-F  caCEK1-R  caBST1-F  caBST1-R  caCDR1-F  caCDR1-R  caCDR2-F  caCDR2-R  caERG11-F  caERG11-R  mACT-F  mACT-R  mTNF-α-F  mTNF-α-R  mIL-6-F  mIL-6-R  mIL-1β-F  mIL-1β-R  mIL-12A-F  mIL12A-R  mIL12B-F  mIL12B-R  mIL-23-F  mIL-23-R  mCXCL1-F  mCXCL1-R  mCXCL2-F  mCXCL2-R  mCCL2-F  mCCL2-R  mCCL7-F  mCCL7-R | TCCGTAGGTGAACCTGCGG  TCCTCCGCTTATTGATATGC  TGGTCCAGGTGCTTCTTCTT  GGTTGCATGAGTGGAACTGA  GATGGTGGCAAGAAAATCTCA  TAGCGAATCCCATTGTACCAG  ACAGCCATGACTTCTGTTGCT  GCAACAAGATTAAGGCCAACA  CGATGAGCCTGTTTGTGAGA  CTCCACTTGCAGGTCTGGTT  CATCATCAGCTTCAACAGCAA  TGAAACTTGACGAGGGGAAG  AATTGCGGCTTCAAGACAAC  CCATCAAATCAACCAGCAGA  TGTTGGGTTGGTCTCGATGG  CCCCACTGCAGTACACACTT  TGCTGAACCGACAGACTCAG  GACCAGCCAATACCCCACAA  TGTTGAAACTGTCATTGATGGCA  GCTGCAGAACCAAACCAAGG  TTACCAACTGGGACGACATG  AGGGACAGCACAGCCTGGAT  GTCCCCAAAGGGATGAGAAGTT  GTTTGCTACGACGTGGGCTACA  AGATAAGCTGGAGTCACAGAAGGAG  CGCACTAGGTTTGCCGAGTAG  CAACCAACAAGTGATATTCTCCATG  GATCCACACTCTCCAGCTGCA  CATCGATGAGCTGATGCAGT  CAGATAGCCCATCACCCTGT  GGATTGTTAGCGAGCTCAGG  AAAACAGCTGCAGGAGGAAA  GACTCAGCCAACTCCTCCAG  GGCACTAAGGGCTCAGTCAG  GCCCTTTGCTGTTAGACTGG  AGCATCCCTACCCTGCTGTA  CTGTCCCTCAACGGAAGAAC  CAACATCTGGGCAATGGAAT  ATTGGGATCATCTTGCTGGT  CCTGCTGTTCACAGTTGCC  CCACATGCTGCTATGTCAAGA  ACACCGACTACTGGTGATCCT |
